# Supplementary material for: Multifunctional composite hydrogel bolus with combined self-healing, antibacterial and adhesive functions for radiotherapy
Source: Royal Society of Chemistry journal article supplement (doi:10.1039/c9tb02967b), 2020-01-01
Supplement: c9tb02967b1.pdf [file c9tb02967b1.pdf]

Supporting information

**Multifunctional composite hydrogel bolus with combined  
self-healing, antibacterial and adhesive functions for  
radiotherapy**

Yi Hou<sup>a</sup>, Ying Song<sup>c</sup>, Xiaodong Sun<sup>d</sup>, Yulin Jiang<sup>a</sup>, Meiling He<sup>a</sup>, Yubao Li<sup>a</sup>, Xianchun Chen<sup>b, \*</sup>, Li Zhang<sup>a, \*</sup>

<sup>a</sup> Analytical & Testing Center, Sichuan University, Chengdu 610065, China

<sup>b</sup> School of Materials Science & Engineering, Sichuan University, Chengdu 610065, China

<sup>c</sup> Department of Radiotherapy, West China Hospital, Sichuan University, Chengdu, 610065, China

<sup>d</sup> West China School of Preclinical and Forensic Medicine, Sichuan University, Chengdu 610041, China

**Table S1 The compositions of experimental hydrogels**

| Hydrogels       | TPU/AAm (wt %)     | AAm (g) | MBA (wt %) | Irgacure 2959 (wt %) | H <sub>2</sub> O (wt %) |
|-----------------|--------------------|---------|------------|----------------------|-------------------------|
| TPU(25%)/PAAm   | 25                 | 4       | 0.03       | 2                    | 70                      |
| TPU(37.5%)/PAAm | 37.5               | 4       | 0.03       | 2                    | 70                      |
| TPU(50%)/PAAm   | 50                 | 4       | 0.03       | 2                    | 70                      |
| PU(50%)/PAAm    | PU/AAm (wt %) = 50 | 4       | 0.03       | 2                    | 70                      |

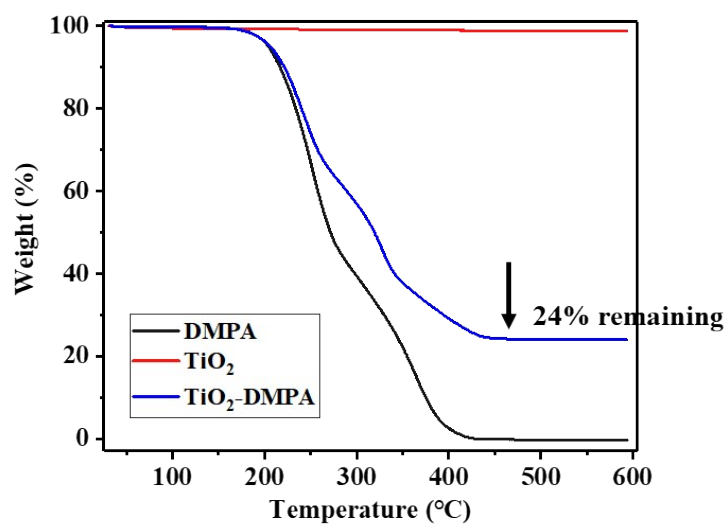

**Fig. S1 TG curves of DMPA, TiO<sub>2</sub> and nTiO<sub>2</sub>-DMPA.**

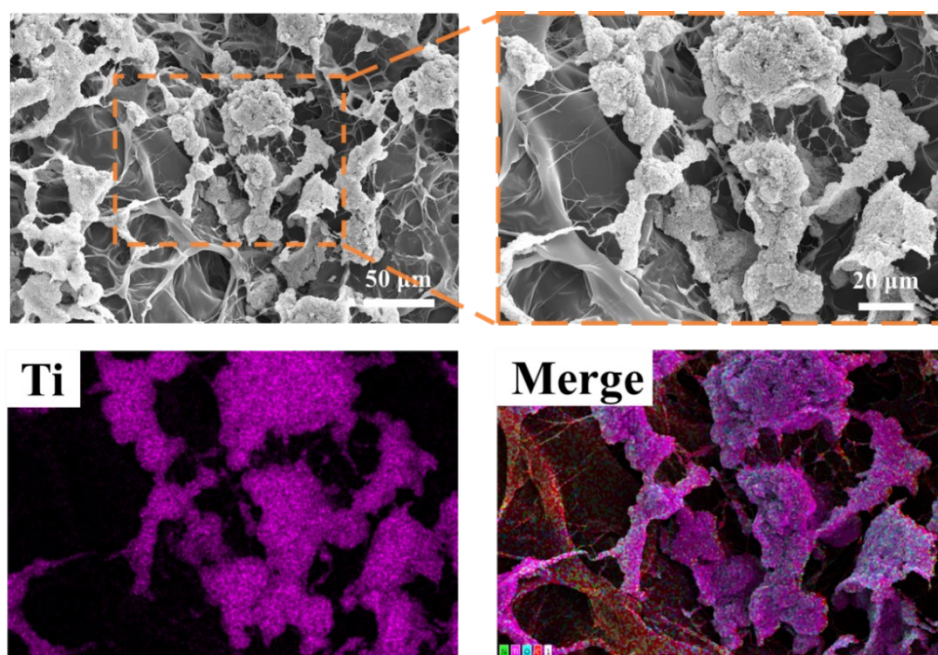

**Fig. S2 SEM images of T/PU/PAAm and the corresponding EDS-mapping**

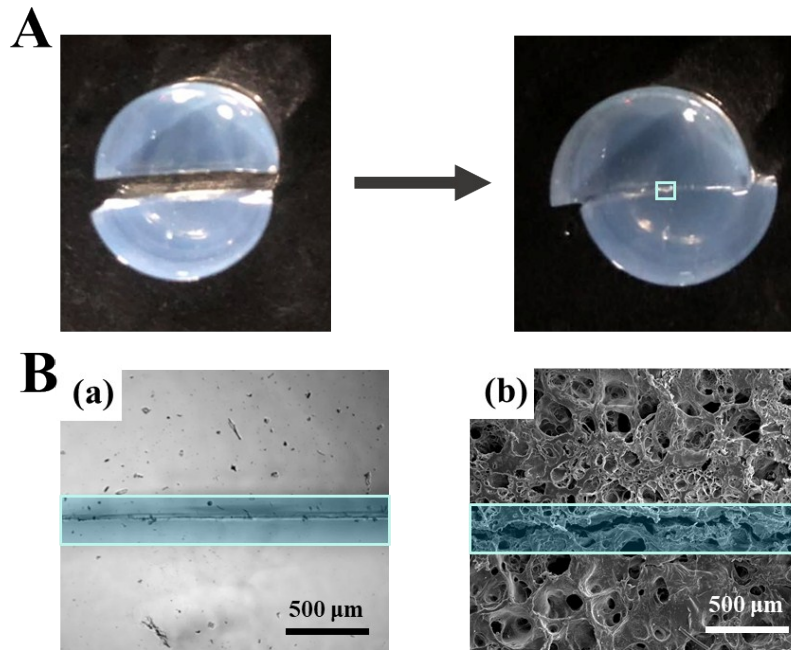

Fig. S3 A) Digital photos and B) micrographs of PAAm hydrogel observed by optical microscope (a) and SEM (b) after healed for 2h.

Since the CT signal of human soft tissue is very similar to  $H_2O$ ,  $H_2O$  is used here instead of human soft tissue. As shown in Fig. S4-a, the hounsfield units (HU) value of PU/PAAm and TPU/PAAm hydrogel are closely to commercial bolus, demonstrating that the presence of  $nTiO_2$  does not obviously affect the physical characteristic of hydrogel. Also, PDD curve of TPU/PAAm hydrogel is basically consistent with the curve of  $H_2O$ , and the dose reaches a maximum value at 1.3 cm under the effect of dose build-up (Fig. S4-b).

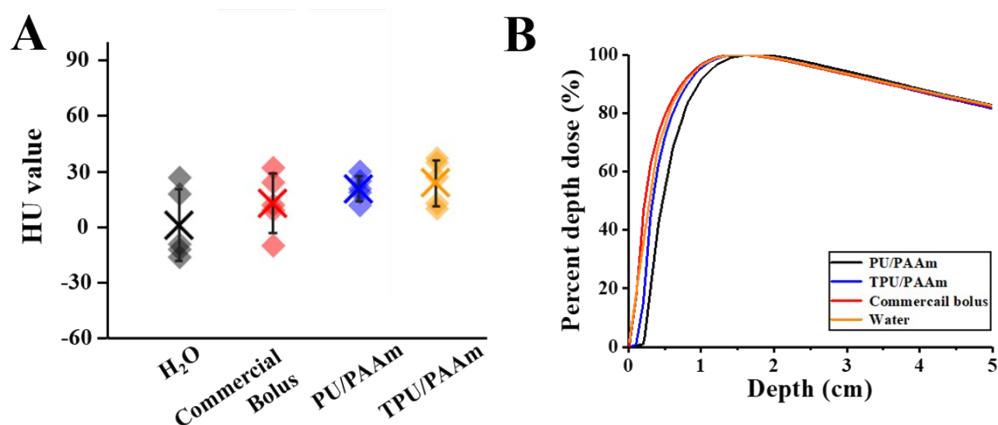

Fig. S4 Hounsfield units (HU) Values(a) and Percent depth dose (PDD) curves (b) of  $H_2O$ , conventional bolus, PU(50%)/PAAm and TPU(50%)/PAAm hydrogels
